# Supplementary material for: Genetically divergent shallow and mesophotic Stephanocoenia intersepta coral populations across Florida Keys National Marine Sanctuary
Source: Research Square preprint supplement (doi:10.21203/rs.3.rs-3314946/v1), 2023-09-19
Supplement: Supplementary file 1 [file cae2b734fe57411b6bd12d07.docx]

**Genetically divergent shallow and mesophotic *Stephanocoenia intersepta* coral populations across Florida Keys National Marine Sanctuary**

Ryan J. Eckert1* (ORCID 0000-0002-3010-9395), Alexis B. Sturm1 (ORCID 0000-0003-2153-7811), Ashley M. Carreiro1 (ORCID 0000-0001-7204-8239), Allison M. Klein1, Joshua D. Voss1 (ORCID 0000-0002-0653-2767)

1Harbor Branch Oceanographic Institute, Florida Atlantic University, Fort Pierce, Florida, USA

*ryan.j.eckert@gmail.com

# **SUPPLEMENTARY INFORMATION**

**Supplementary Table S1. Stephanocoenia intersepta sampling data.**

| **Site** | **Depth  zone** | **Sampling  depth (m)** | **Average  depth (m)** | ***N*** |
| --- | --- | --- | --- | --- |
| Upper Keys | Shallow | 18.3–28.3 | 23.6 | 30 |
|  | Mesophotic | 41.8–45.4 | 43.9 | 30 |
| Lower Keys | Shallow | 17.1–19.2 | 18.0 | 30 |
|  | Mesophotic | 31.4–35.1 | 32.8 | 30 |
| Tortugas Bank | Shallow | 14.6–29.9 | 21.1 | 30 |
|  | Mesophotic | 30.2–35.1 | 32.0 | 25 |
| Riley's Hump | Shallow | 25.3–28 | 26.4 | 30 |
|  | Mesophotic | 30.8–37.5 | 33.2 | 15 |

**Supplementary Table S2. Distance-based redundancy analyses.** Variance partition and analysis of variance outputs for environmental variables tested in dbRDA for *S. intersepta* genetic variation and *in hospite* Symbiodiniaceae *ITS2* type profile community structure.

|  |  | **Variance partition** | | |  | **ANOVA** | | |
| --- | --- | --- | --- | --- | --- | --- | --- | --- |
| **Organism** | **Variable** | **df** | ***R*2** | **Adjusted *R*2** |  | **SS** | ***F*** | ***p*-value** |
| *S. intersepta* | Depth (m) | 1 | 0.01954 | 0.01504 |  | 0.3136 | 4.3445 | 0.001 |
|  | Primary productivity (g m-3‑d-1) | 1 | 0.00579 | 0.00123 |  | 0.093 | 1.2702 | 0.04 |
|  | Global | 2 | 0.02569 | 0.01671 |  | 0.4123 | 2.8611 | 0.001 |
| Symbiodiniaceae | Depth (m) | 2 | 0.07981 | 0.07557 |  | 7.312 | 18.821 | 0.001 |
|  | Current velocity (m s-1) | 2 | 0.03670 | 0.03226 |  | 3.362 | 8.2665 | 0.001 |
|  | Light (E m-2 yr-1) | 2 | 0.01925 | 0.01473 |  | 1.764 | 4.2594 | 0.001 |
|  | Global | 3 | 0.14886 | 0.13295 |  | 12.608 | 11.437 | 0.001 |

df = degrees of freedom; *R* = correlation coefficient; SS = sum of squares; *F* = F-statistic

**Supplementary Table S3. Average recent migration rates by source/sink depth zones.**

| **Dataset** | **Mean *m*** | **SD** | **SEM** |
| --- | --- | --- | --- |
| Global | 3.74 | 4.73 | 0.63 |
| Mesophotic Sources | 5.52 | 5.90 | 1.11 |
| Shallow Sources | 1.96 | 2.04 | 0539 |
| Mesophotic Sinks | 3.50 | 5.70 | 1.08 |
| Shallow Sink | 3.99 | 3.60 | 0.68 |
| Mesophotic → Shallow | 4.89 | 3.93 | 0.98 |
| Mesophotic → Mesophotic | 6.37 | 7.93 | 2.29 |
| Shallow → Mesophotic | 1.35 | 0.86 | 0.22 |
| Shallow → Shallow | 2.78 | 2.83 | 0.80 |

**Supplementary Table S4. Test results from PERMANOVA (9,999 permutations) of Symbiodiniaceae *ITS2* type profiles.** Pairwise comparisons FDR corrected**.**

| **Test** | **Comparison** | **Pseudo-*F*** | ***R2*** | ***p*-value** |
| --- | --- | --- | --- | --- |
| Overall | Depth | 16.141 | 0.0586 | 0.0001 |
|  | Site | 8.474 | 0.0923 | 0.0001 |
|  | Depth:Site | 7.629 | 0.0831 | 0.0001 |
| Site | Riley's Hump vs Tortugas Bank | 7.607 | 0.0720 | 0.0002 |
|  | Riley's Hump vs Lower Keys | 11.696 | 0.1029 | 0.0002 |
|  | Riley's Hump vs Upper Keys | 9.258 | 0.0825 | 0.0002 |
|  | Tortugas Bank vs Lower Keys | 2.446 | 0.0214 | 0.0334 |
|  | Tortugas Bank vs Upper Keys | 4.427 | 0.0377 | 0.0017 |
|  | Lower Keys vs Upper Keys | 9.015 | 0.0715 | 0.0002 |
| Site:Depth | Riley's Hump Shallow vs Riley's Hump Mesophotic | 1.851 | 0.041 | **ns** |
|  | Riley's Hump Shallow vs Tortugas Bank Shallow | 7.430 | 0.114 | 0.0002 |
|  | Riley's Hump Shallow vs Tortugas Bank Mesophotic | 8.640 | 0.140 | 0.0002 |
|  | Riley's Hump Shallow vs Lower Keys Shallow | 15.489 | 0.214 | 0.0002 |
|  | Riley's Hump Shallow vs Lower Keys Mesophotic | 13.467 | 0.188 | 0.0002 |
|  | Riley's Hump Shallow vs Upper Keys Shallow | 13.585 | 0.190 | 0.0002 |
|  | Riley's Hump Shallow vs Upper Keys Mesophotic | 6.845 | 0.106 | 0.0005 |
|  | Riley's Hump Mesophotic vs Tortugas Bank Shallow | 4.482 | 0.094 | 0.0011 |
|  | Riley's Hump Mesophotic vs Tortugas Bank Mesophotic | 3.196 | 0.078 | 0.0272 |
|  | Riley's Hump Mesophotic vs Lower Keys Shallow | 10.357 | 0.198 | 0.0002 |
|  | Riley's Hump Mesophotic vs Lower Keys Mesophotic | 5.584 | 0.115 | 0.0033 |
|  | Riley's Hump Mesophotic vs Upper Keys Shallow | 7.007 | 0.140 | 0.0005 |
|  | Riley's Hump Mesophotic vs Upper Keys Mesophotic | 1.342 | 0.030 | **ns** |
|  | Tortugas Bank Shallow vs Tortugas Bank Mesophotic | 7.456 | 0.123 | 0.0004 |
|  | Tortugas Bank Shallow vs Lower Keys Shallow | 6.042 | 0.096 | 0.0011 |
|  | Tortugas Bank Shallow vs Lower Keys Mesophotic | 9.729 | 0.144 | 0.0002 |
|  | Tortugas Bank Shallow vs Upper Keys Shallow | 9.906 | 0.146 | 0.0002 |
|  | Tortugas Bank Shallow vs Upper Keys Mesophotic | 9.477 | 0.140 | 0.0002 |
|  | Tortugas Bank Mesophotic vs Lower Keys Shallow | 16.781 | 0.244 | 0.0002 |
|  | Tortugas Bank Mesophotic vs Lower Keys Mesophotic | 1.193 | 0.022 | **ns** |
|  | Tortugas Bank Mesophotic vs Upper Keys Shallow | 3.741 | 0.066 | 0.0147 |
|  | Tortugas Bank Mesophotic vs Upper Keys Mesophotic | 3.855 | 0.068 | 0.0258 |
|  | Lower Keys Shallow vs Lower Keys Mesophotic | 21.369 | 0.273 | 0.0002 |
|  | Lower Keys Shallow vs Upper Keys Shallow | 20.115 | 0.261 | 0.0002 |
|  | Lower Keys Shallow vs Upper Keys Mesophotic | 21.339 | 0.272 | 0.0002 |
|  | Lower Keys Mesophotic vs Upper Keys Shallow | 4.919 | 0.078 | 0.0060 |
|  | Lower Keys Mesophotic vs Upper Keys Mesophotic | 9.149 | 0.136 | 0.0006 |
|  | Upper Keys Shallow vs Upper Keys Mesophotic | 10.593 | 0.154 | 0.0002 |

**ns** = non-significant *p*-value

**
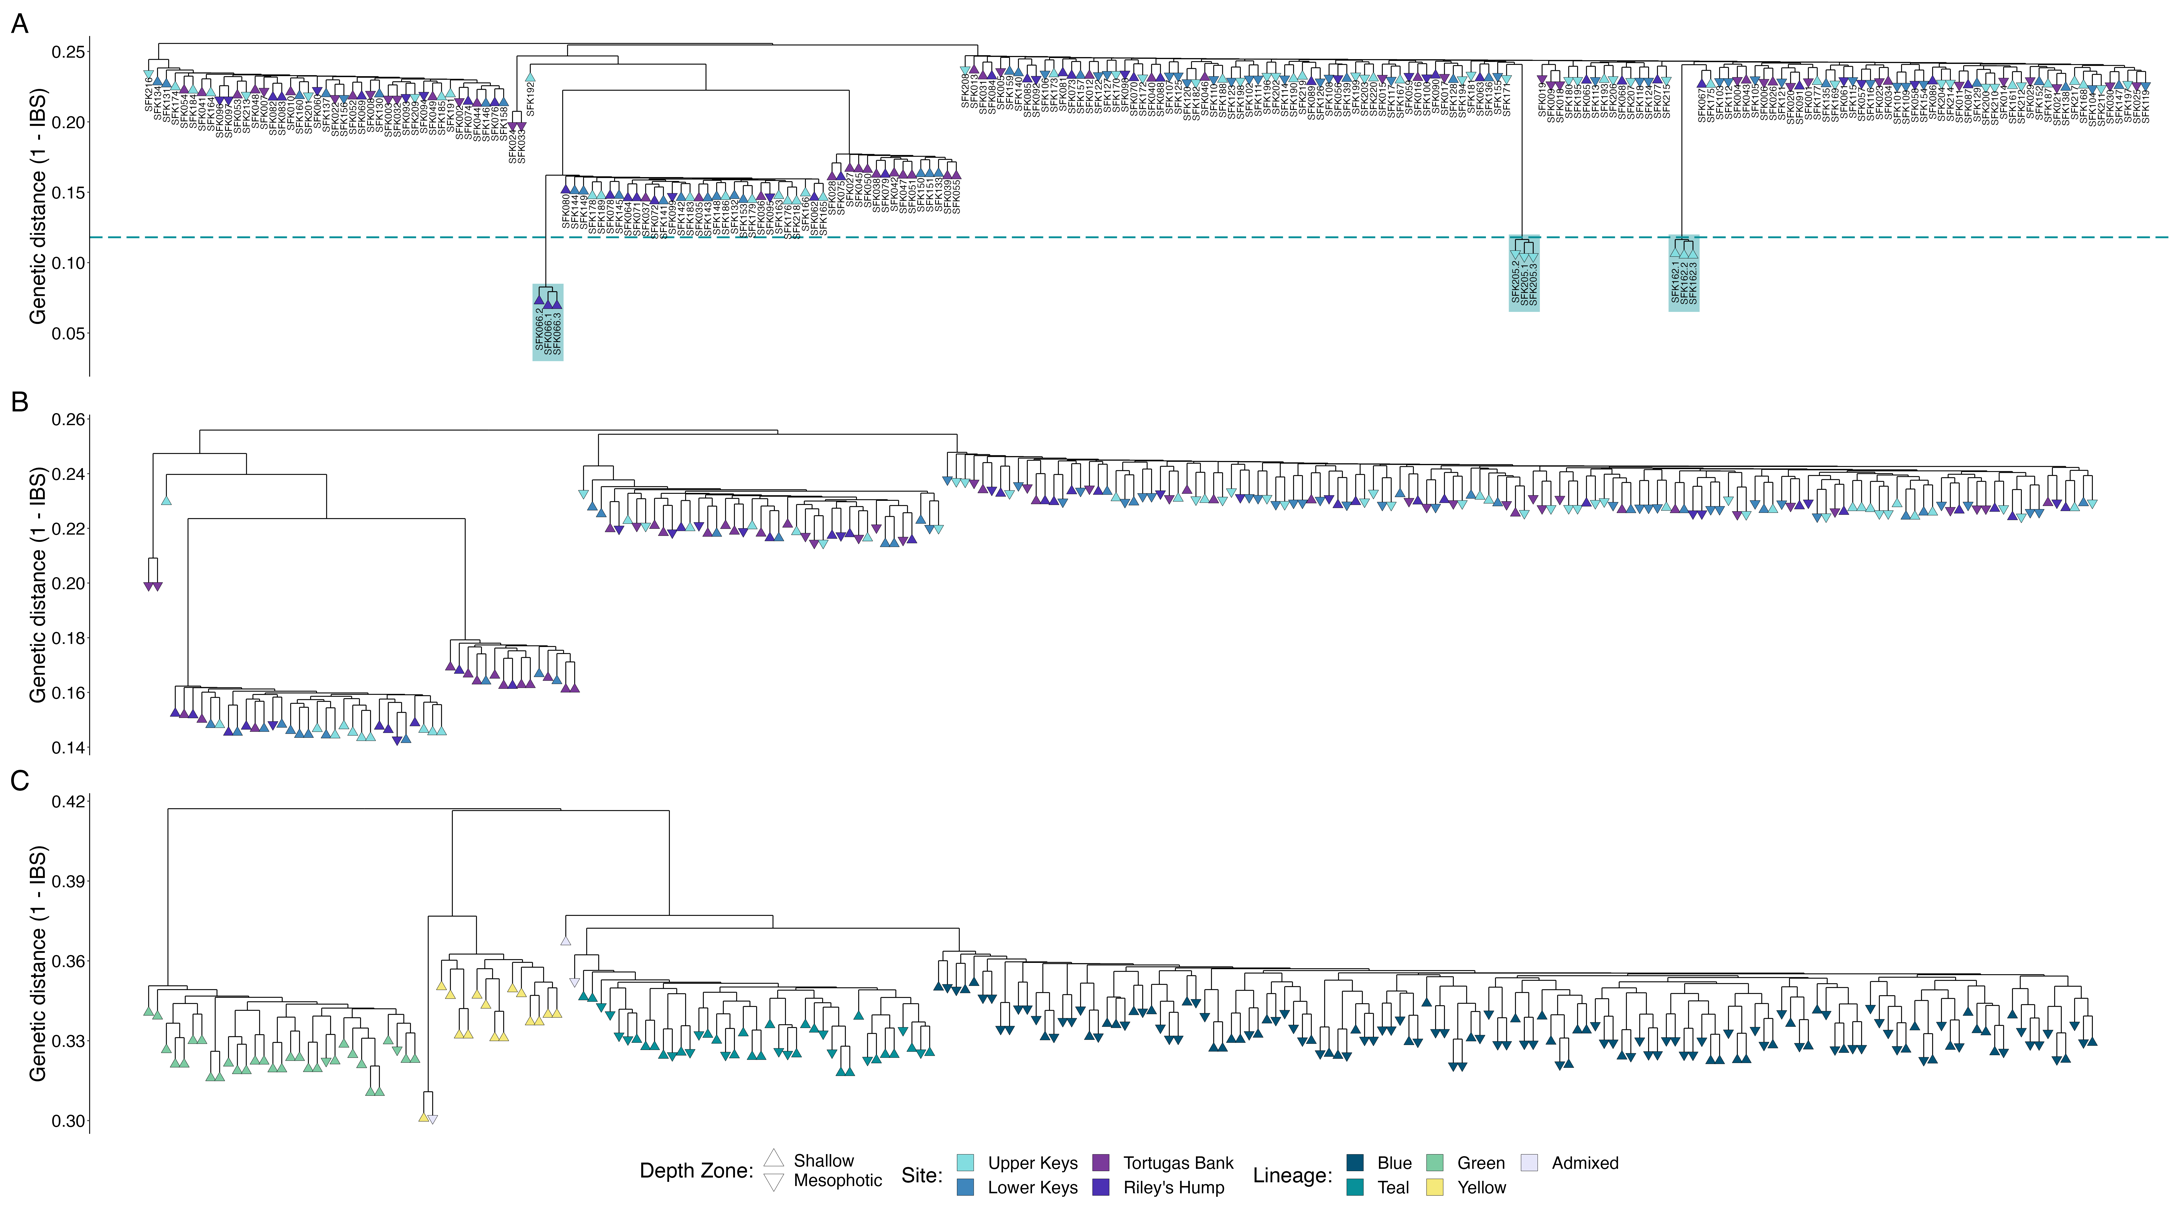
**

**Supplementary Figure S1. *Stephanocoenia intersepta* cluster dendrograms. A)** Hierarchical clustering of samples based on genetic distance (identity-by-state) including technical triplicate samples (red boxes) to establish a baseline for clonality (red dashed line). **B)** Hierarchical clustering of samples without technical replicates. **C)** Hierarchical clustering of samples in **(B)** based on IBS from common SNPs among lineages, colored by lineage assignment from ngsadmix.
